# Supplementary material for: Totally laparoscopic total gastrectomy with linear anastomosis versus laparoscopic-assisted total gastrectomy in gastric cancer：a single-center experience with meta-analysis
Source: Research Square preprint supplement (doi:10.21203/rs.3.rs-1735093/v1), 2022-06-10
Supplement: Supplementary file 1 [file 71a6d91620d1e4289c54b77e.docx]

**Table S8.** Overall results comparing TLTG with LATG excluding these articles contributed to the heterogeneity

|  | | | | | **Test for Overall Effect** | | **Test for Heterogeneity** | | |
| --- | --- | --- | --- | --- | --- | --- | --- | --- | --- |
| **Items** | **Type** | | **n**a | **WMD or RR 95% CI** | ***Z*** | ***P*** | ***I*²** | ***P*** |
| Operative time(min) | | NRS | 7 | 5.47 (-0.65, 11.58) | 1.75 | 0.080 | 0.00% | 0.821 |
| Number of harvested lymph nodes | | NRS | 8 | 4.67 (3.47, 5.86) | 7.66 | **<0.001** | 0.00% | 0.690 |
| Blood Loss(ml) | | NRS | 6 | -52.95(-61.93, -43.96) | 11.55 | **<0.001** | 38.8% | 0.133 | |
| Gas-passing(days) | | NRS | 7 | 0.08 (-0.03, 0.20) | 1.51 | 0.131 | 0.00% | 0.726 |
| Start of liquid diet(days) | | NRS | 5 | 0.18 (-0.03,0.39) | 1.72 | 0.085 | 0.00% | 0.895 |
| Start of soft diet(days) | | NRS | 4 | -0.09 (-0.78, 0.60) | 0.26 | 0.794 | 25.8% | 0.257 |
| Postoperative hospital stay(days) | | NRS | 8 | 0.125(-0.56, 0.81) | 0.36 | 0.721 | 0.00% | 0.909 |
| Overall complications | | NRS | 9 | 0.97 (0.81, 1.15) | 0.40 | 0.689 | 0.00% | 0.889 |
| Anastomosis-related complications | | NRS | 10 | 1.03(0.69,1.54) | 0.14 | 0.887 | 36.1% | 0.110 |

CI, confidence interval; TLTG, total laparoscopic total gastrectomy; LATG, laparoscopic-assisted total gastrectomy; RR, relative risks; WMD, weighed mean difference; NRS, non-randomized studies; data in bold, significant *P*-value.

a Number of comparisons.
