# Supplementary material for: Totally laparoscopic total gastrectomy with linear anastomosis versus laparoscopic-assisted total gastrectomy in gastric cancer：a single-center experience with meta-analysis
Source: Research Square preprint supplement (doi:10.21203/rs.3.rs-1735093/v1), 2022-06-10
Supplement: Supplementary file 2 [file a8905949ab1ed329404e62e0.docx]

**Table S6**. Details of the articles included in the meta-analysis exclude the present study

| References | Year | Country | Journal | Sample size | | Type of the study |
| --- | --- | --- | --- | --- | --- | --- |
| LATG | TLTG |
| Chen K | 2016 | China | BMC surgery | 121 | 32 | Retrospective cohort study |
| Gong C | 2017 | Korea | WJG | 266 | 421 | Retrospective cohort study |
| Han W | 2020 | Korea | Surgical Endoscopy | 110 | 92 | Retrospective cohort study |
| Huang Z | 2017 | China | WJG | 102 | 51 | Retrospective cohort study |
| Jeong O | 2020 | Korea | Surgical Endoscopy | 292 | 118 | Retrospective cohort study |
| Kim HS | 2013 | Korea | J Laparoendosc Adv Surg Tech A | 23 | 90 | Retrospective cohort study |
| Kim HB | 2016 | Korea | Surg Laparosc Endosc Percutan Tech | 24 | 30 | Retrospective cohort study |
| Kim EY | 2016 | Korea | Anticancer research | 29 | 27 | Retrospective cohort study |
| Wang Z | 2021 | China | J Gastrointest Oncol. | 74 | 36 | Retrospective cohort study |
| Yang H | 2021 | Korea | Surgical Endoscopy | 45 | 51 | Prospective Cohort study |
