# Supplementary material for: Totally laparoscopic total gastrectomy with linear anastomosis versus laparoscopic-assisted total gastrectomy in gastric cancer：a single-center experience with meta-analysis
Source: Research Square preprint supplement (doi:10.21203/rs.3.rs-1735093/v1), 2022-06-10
Supplement: Supplementary file 4 [file f9141cb1946aeedf31ada876.docx]

**Table S5** Comparison of clinicopathological characteristics between TLTG-π group and TLTG-overlap group

| Characteristics | All patients (n =108) | | P value | Patient propensity matching(n=44) | | P value |
| --- | --- | --- | --- | --- | --- | --- |
| π(n=86) | overlap(n=22) | π(n=22) | overlap(n=22) |
| Age | 63.21±9.167 | 57.45±12.258 | 0.016 | 58.82±8.449 | 57.45±12.258 | 0.670 |
| Gender |  |  | 0.170 |  |  | 1.000 |
| Male | 64 | 20 |  | 21 | 20 |  |
| Female | 22 | 2 |  | 1 | 2 |  |
| BMI(kg/m2) | 22.89±2.582 | 22.70±2.626 | 0.753 | 22.67±1.881 | 22.70±2.626 | 0.975 |
| Tumor Location |  |  | 0.002 |  |  | 0.187 |
| Upper | 69 | 11 |  | 15 | 11 |  |
| Middle | 16 | 8 |  | 6 | 8 |  |
| Total | 1 | 3 |  | 1 | 3 |  |
| Tumor size(cm) | 3.32±1.925 | 3.85±2.691 | 0.298 | 3.69±2.666 | 3.85±2.691 | 0.852 |
| pT stage |  |  | 0.782 |  |  | 0.746 |
| T1 | 31 | 5 |  | 4 | 5 |  |
| T2 | 12 | 6 |  | 6 | 6 |  |
| T3 | 30 | 9 |  | 10 | 9 |  |
| T4 | 13 | 2 |  | 2 | 2 |  |
| pN-stage |  |  | 0.809 |  |  | 0.327 |
| N0 | 42 | 11 |  | 14 | 11 |  |
| N1 | 14 | 2 |  | 2 | 2 |  |
| N2 | 15 | 4 |  | 3 | 4 |  |
| N3 | 15 | 5 |  | 3 | 5 |  |
| TNM stage |  |  | 0.647 |  |  | 0.483 |
| I | 38 | 8 |  | 10 | 8 |  |
| II | 18 | 6 |  | 6 | 6 |  |
| III | 30 | 8 |  | 6 | 8 |  |
| IV | 0 | 0 |  | 0 | 0 |  |
| Lauren type |  |  | 0.146 |  |  | 0.044 |
| Intestinal | 36 | 5 |  | 10 | 5 |  |
| Diffuse | 12 | 6 |  | 4 | 6 |  |
| Mixed | 24 | 8 |  | 3 | 8 |  |
